# Supplementary material for: DISCO-SCA and Properly Applied GSVD as Swinging Methods to Find Common and Distinctive Processes
Source: PLoS One. 2012 May 31;7(5):e37840. doi: 10.1371/journal.pone.0037840 (PMC3365060; doi:10.1371/journal.pone.0037840)
Supplement: Table S2 — Output of GSEA applied to human data with the DISCO-SCA components as phenotype. Only the names for gene sets with FWER p-value<.10 are shown. (none) indicates that no gene set with FWER p-value<.10 was found. (XLS) [file pone.0037840.s003.xls]

## Sheet: GSEA_DISCO_humandata
COMPONENT	NAME	GS<br> follow link to MSigDB	GS DETAILS	SIZE	ES	NES	NOM p-val	FDR q-val	FWER p-val	RANK AT MAX	LEADING EDGE
Common1_negative	ESTABLISHMENT_AND_OR_MAINTENANCE_OF_CHROMATIN_ARCHITECTURE	ESTABLISHMENT_AND_OR_MAINTENANCE_OF_CHROMATIN_ARCHITECTURE		43	-0.31184676	-23906617	0.0	0.069945104	0.105	3434	tags=70%, list=39%, signal=113%
Common1_positive	RESPONSE_TO_CHEMICAL_STIMULUS	RESPONSE_TO_CHEMICAL_STIMULUS		138	0.1976222	27394605	0.0	0.012230113	0.0090	2064	tags=43%, list=23%, signal=55%
Common2_negative	STRUCTURAL_CONSTITUENT_OF_RIBOSOME	STRUCTURAL_CONSTITUENT_OF_RIBOSOME		44	-0.54019475	-42184324	0.0	0.0	0.0	2690	tags=84%, list=30%, signal=120%
	MITOCHONDRIAL_MEMBRANE_PART	MITOCHONDRIAL_MEMBRANE_PART		33	-0.4776073	-3272327	0.0	0.0	0.0	3841	tags=91%, list=43%, signal=160%
	MITOCHONDRIAL_PART	MITOCHONDRIAL_PART		87	-0.2937596	-31924193	0.0	0.0	0.0	3841	tags=72%, list=43%, signal=127%
	MITOCHONDRION	MITOCHONDRION		184	-0.20229426	-31869576	0.0	0.0	0.0	3881	tags=64%, list=44%, signal=111%
	MITOCHONDRIAL_ENVELOPE	MITOCHONDRIAL_ENVELOPE		58	-0.34485695	-31140344	0.0	0.0	0.0	3841	tags=78%, list=43%, signal=136%
	MITOCHONDRIAL_MEMBRANE	MITOCHONDRIAL_MEMBRANE		55	-0.35073283	-3061686	0.0	0.0	0.0	3841	tags=78%, list=43%, signal=137%
	MITOCHONDRIAL_INNER_MEMBRANE	MITOCHONDRIAL_INNER_MEMBRANE		43	-0.3591784	-2813773	0.0	808.201	0.0060	3841	tags=79%, list=43%, signal=139%
	MITOCHONDRIAL_RESPIRATORY_CHAIN	MITOCHONDRIAL_RESPIRATORY_CHAIN		17	-0.55022544	-2651935	0.0	0.002632373	0.022	2954	tags=88%, list=33%, signal=132%
	ORGANELLE_INNER_MEMBRANE	ORGANELLE_INNER_MEMBRANE		49	-0.30310777	-25322373	0.0	0.00540299	0.051	3841	tags=73%, list=43%, signal=129%
	RIBOSOME	RIBOSOME		25	-0.43333334	-25186422	0.0	0.0053527127	0.056	1489	tags=60%, list=17%, signal=72%
	CHROMOSOMAL_PART	CHROMOSOMAL_PART		57	-0.2777253	-24642644	0.0	0.0061660567	0.069	3775	tags=70%, list=43%, signal=121%
	GENERATION_OF_PRECURSOR_METABOLITES_AND_ENERGY	GENERATION_OF_PRECURSOR_METABOLITES_AND_ENERGY		48	-0.3042021	-24535923	0.0	0.005813841	0.071	4336	tags=79%, list=49%, signal=154%
	CHROMOSOME	CHROMOSOME		72	-0.24444981	-24328725	0.0	0.006337297	0.082	4130	tags=71%, list=47%, signal=132%
	RNA_BINDING	RNA_BINDING		147	-0.17010315	-24272664	0.0	0.006018379	0.084	4005	tags=62%, list=45%, signal=111%
Common2_positive	PLASMA_MEMBRANE	PLASMA_MEMBRANE		450	0.1194799	28222733	0.0	0.0030572836	0.0030	5710	tags=76%, list=64%, signal=202%
	PLASMA_MEMBRANE_PART	PLASMA_MEMBRANE_PART		350	0.122854106	26941135	0.0	0.0056992196	0.011	6550	tags=86%, list=74%, signal=315%
Common3_negative	MICROTUBULE_CYTOSKELETON	MICROTUBULE_CYTOSKELETON		67	-0.31082988	-30592368	0.0	0.0	0.0	2426	tags=58%, list=27%, signal=80%
	M_PHASE_OF_MITOTIC_CELL_CYCLE	M_PHASE_OF_MITOTIC_CELL_CYCLE		44	-0.38062963	-2996325	0.0	4754.1	0.0010	270	tags=41%, list=3%, signal=42%
	M_PHASE	M_PHASE		55	-0.3303712	-28906062	0.0	643.516	0.0020	314	tags=36%, list=4%, signal=37%
	MITOSIS	MITOSIS		42	-0.3761937	-28112683	0.0	9530.11	0.0040	270	tags=40%, list=3%, signal=42%
	CYTOSKELETON	CYTOSKELETON		173	-0.1869653	-2795879	0.0	762.409	0.0040	2526	tags=47%, list=29%, signal=64%
	MITOTIC_CELL_CYCLE	MITOTIC_CELL_CYCLE		83	-0.2612523	-27732108	0.0	793.292	0.0050	270	tags=29%, list=3%, signal=30%
	CELL_CYCLE_PROCESS	CELL_CYCLE_PROCESS		102	-0.22214308	-26203315	0.0	0.0023928	0.018	314	tags=25%, list=4%, signal=26%
	CELL_CYCLE_PHASE	CELL_CYCLE_PHASE		89	-0.23672469	-25960088	0.0	0.002314138	0.02	314	tags=27%, list=4%, signal=28%
	NON_MEMBRANE_BOUND_ORGANELLE	NON_MEMBRANE_BOUND_ORGANELLE		310	-0.12068846	-24387915	0.0	0.0096718855	0.09	2371	tags=38%, list=27%, signal=51%
Common3_positive	(none)
Yeast_negative	(none)
Yeast_positive	MITOCHONDRION	MITOCHONDRION		184	0.22679996	35657198	0.0	0.0	0.0	4148	tags=69%, list=47%, signal=127%
	STRUCTURAL_CONSTITUENT_OF_RIBOSOME	STRUCTURAL_CONSTITUENT_OF_RIBOSOME		44	0.4382712	34819806	0.0	0.0	0.0	3184	tags=80%, list=36%, signal=124%
	MITOCHONDRIAL_PART	MITOCHONDRIAL_PART		87	0.32456857	34533358	0.0	0.0	0.0	3263	tags=69%, list=37%, signal=108%
	MITOCHONDRIAL_ENVELOPE	MITOCHONDRIAL_ENVELOPE		58	0.3183027	28932133	0.0	0.0011427114	0.0040	3920	tags=76%, list=44%, signal=135%
	OXIDOREDUCTASE_ACTIVITY	OXIDOREDUCTASE_ACTIVITY		132	0.20533681	27174416	0.0	0.0021023992	0.0090	3242	tags=57%, list=37%, signal=88%
	MITOCHONDRIAL_MEMBRANE	MITOCHONDRIAL_MEMBRANE		55	0.3049459	26955695	0.0	0.0019409226	0.01	3920	tags=75%, list=44%, signal=133%
	GENERATION_OF_PRECURSOR_METABOLITES_AND_ENERGY	GENERATION_OF_PRECURSOR_METABOLITES_AND_ENERGY		48	0.32511583	2683324	0.0	0.002003341	0.012	3965	tags=77%, list=45%, signal=139%
	MITOCHONDRIAL_MATRIX	MITOCHONDRIAL_MATRIX		30	0.40429077	2633846	0.0	0.002501538	0.017	2632	tags=70%, list=30%, signal=99%
	MITOCHONDRIAL_LUMEN	MITOCHONDRIAL_LUMEN		30	0.40429077	26292844	0.0	0.002351525	0.018	2632	tags=70%, list=30%, signal=99%
	TRANSLATION	TRANSLATION		80	0.24435699	25965939	0.0	0.0029378699	0.025	5054	tags=81%, list=57%, signal=187%
	MITOCHONDRIAL_MEMBRANE_PART	MITOCHONDRIAL_MEMBRANE_PART		33	0.37718526	25712888	0.0	0.0035129297	0.032	3920	tags=82%, list=44%, signal=146%
	MITOCHONDRIAL_INNER_MEMBRANE	MITOCHONDRIAL_INNER_MEMBRANE		43	0.32662553	255611	0.0	0.0036168513	0.036	3920	tags=77%, list=44%, signal=137%
	ORGANELLE_INNER_MEMBRANE	ORGANELLE_INNER_MEMBRANE		49	0.29391783	24708884	0.0	0.006186609	0.064	3920	tags=73%, list=44%, signal=131%
	ELECTRON_TRANSPORT_GO_0006118	ELECTRON_TRANSPORT_GO_0006118		21	0.43143117	24215047	0.0	0.0078118397	0.087	2515	tags=71%, list=28%, signal=99%
Human_negative	(none)
Human_positive	(none)
